# Supplementary material
Source: Springer Nature journal article supplement (https://www.springermedizin.de/resource/supplementary/12998_2010_9_MOESM5_ESM.pdf/9680028)
Supplement: MOESM5 [file 9680028]

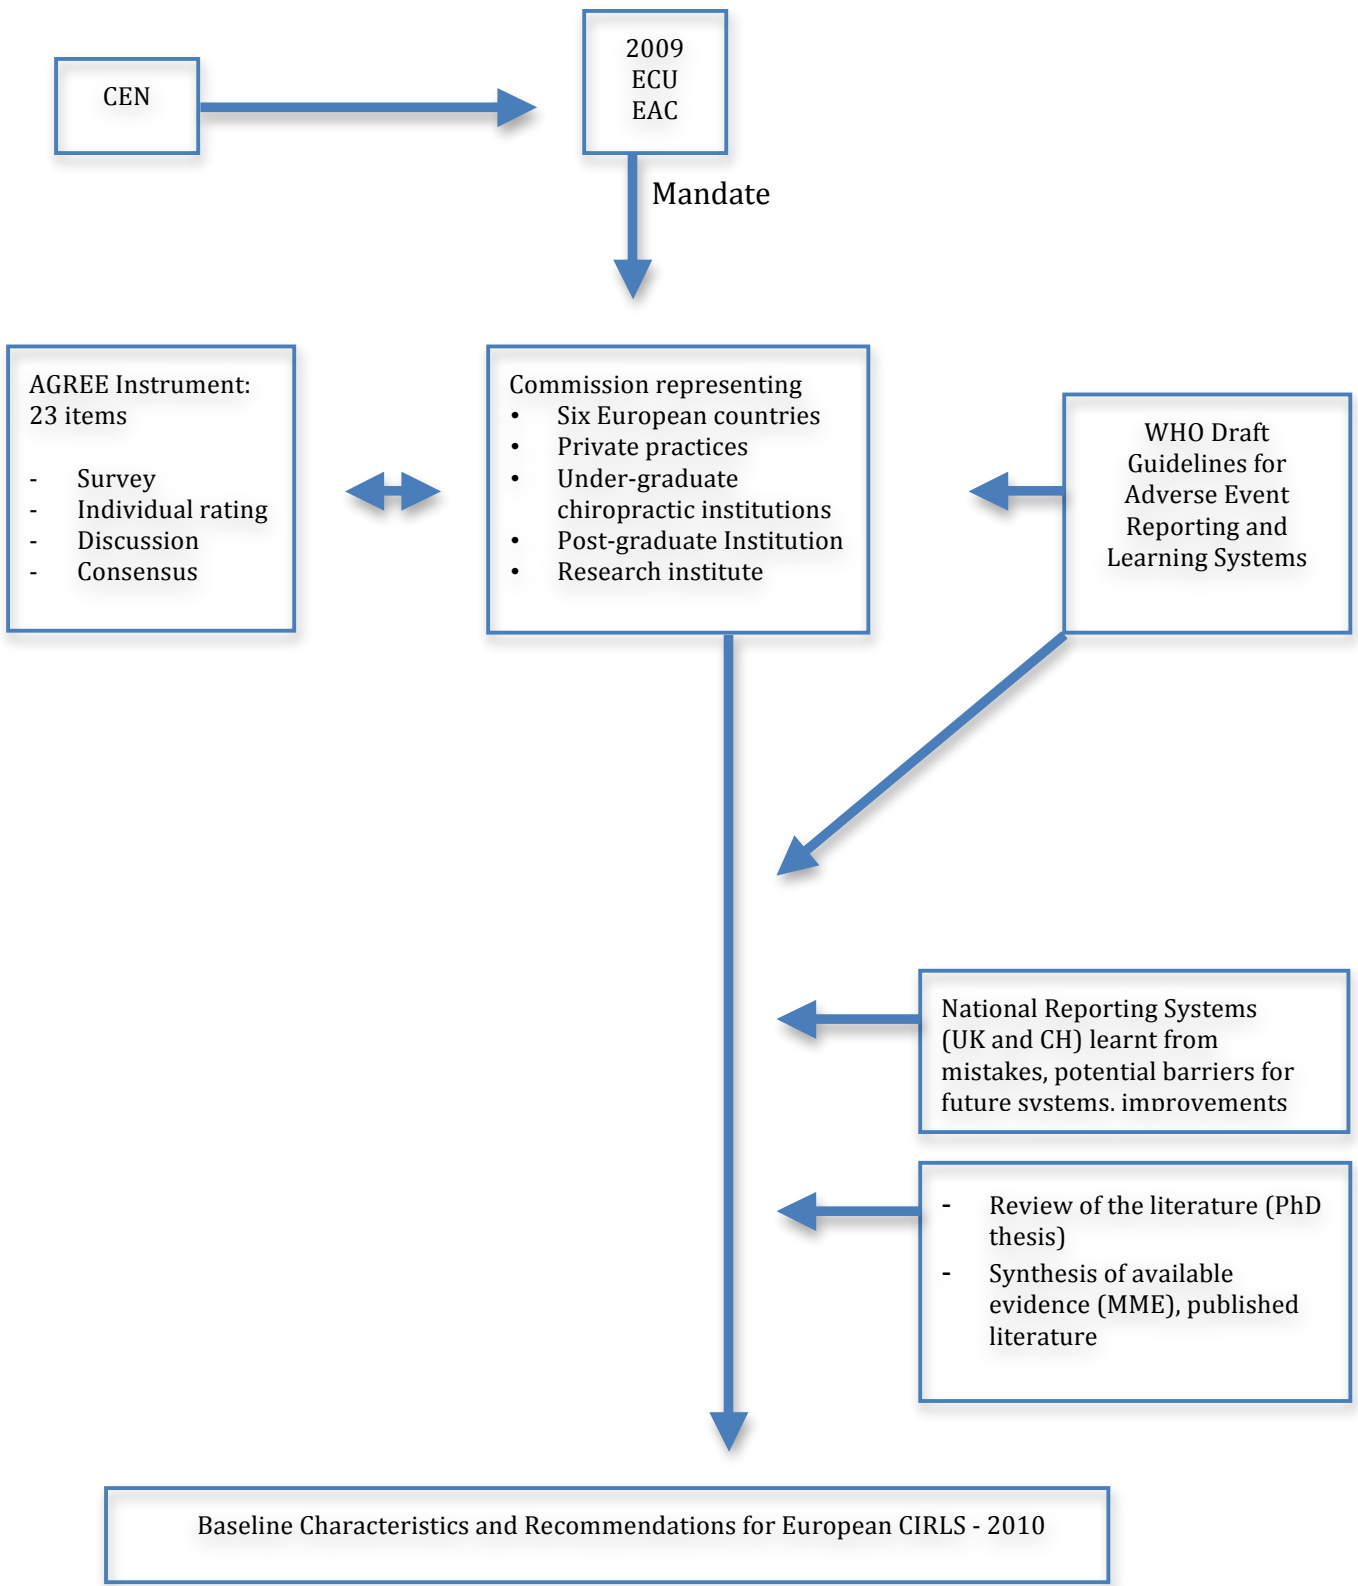

CEN

2009  
ECU  
EAC

Mandate

AGREE Instrument:  
23 items

- Survey
- Individual rating
- Discussion
- Consensus

Commission representing

- Six European countries
- Private practices
- Under-graduate chiropractic institutions
- Post-graduate Institution
- Research institute

WHO Draft Guidelines for Adverse Event Reporting and Learning Systems

National Reporting Systems (UK and CH) learnt from mistakes, potential barriers for future systems. improvements

- Review of the literature (PhD thesis)
- Synthesis of available evidence (MME), published literature

Baseline Characteristics and Recommendations for European CIRS - 2010
